# Supplementary material for: A new pyridoxal-derived gelator for selective recognition of CN − and F − under different conditions
Source: Royal Society of Chemistry journal article supplement (doi:10.1039/d2su00135g), 2023-01-01

## Supporting Information

### Pyridoxal-derived a new gelator for selective recognition of $\text{CN}^-$ and $\text{F}^-$ under different conditions

Subhasis Ghosh, Nabajyoti Baildya and Kumares Ghosh\*

Department of Chemistry, University of Kalyani, Kalyani-741235, India.  
Email: [ghosh\\_k2003@yahoo.co.in](mailto:ghosh_k2003@yahoo.co.in); [kumareschem18@klyuniv.ac.in](mailto:kumareschem18@klyuniv.ac.in)

**Table 1S:** Summary of gel property of compound **1** in different solvents

| Solvents                              | Results           |
|---------------------------------------|-------------------|
| DMF                                   | S                 |
| DMF:H <sub>2</sub> O(10:1, v/v)       | <b>G(7 mg/mL)</b> |
| DMSO                                  | S                 |
| DMSO:H <sub>2</sub> O(10:1, v/v)      | <b>G(7 mg/mL)</b> |
| CHCl <sub>3</sub> :CH <sub>3</sub> OH | S                 |
| CHCl <sub>3</sub>                     | I                 |
| Benzene                               | I                 |
| Toluene                               | I                 |
| Nitrobenzene                          | I                 |
| CH <sub>3</sub> CN                    | I                 |
| THF                                   | I                 |
| 1,4-Dioxane                           | S                 |
| 1,4-Dioxane:H <sub>2</sub> O          | I                 |

S = Soluble, G = Gel, I = Insoluble

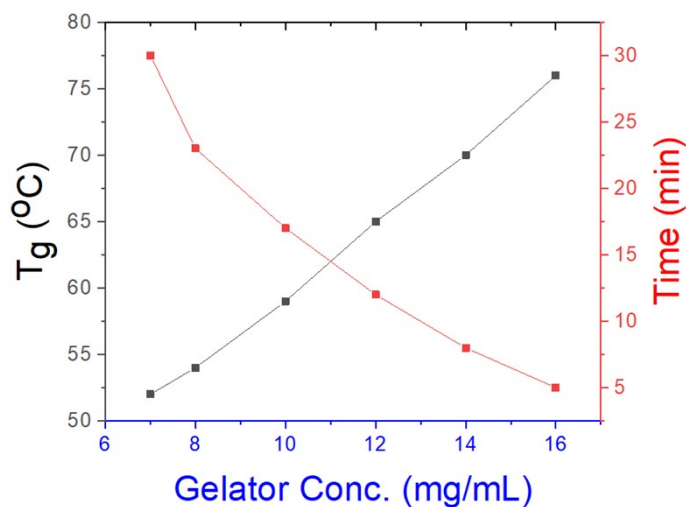

**Figure 1S.** Plots showing variation of conc. (mg/mL) of **1** vs  $T_{\text{gel}}$  (°C) vs Time (min) taken for gel formation.

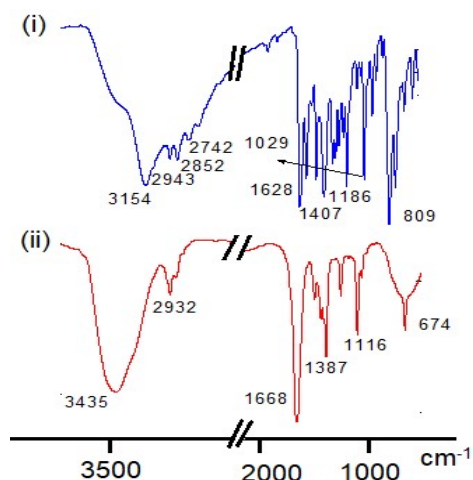

**Figure 2S.** Partial FTIR spectra of compound **1** (i) in amorphous and (ii) gel states.

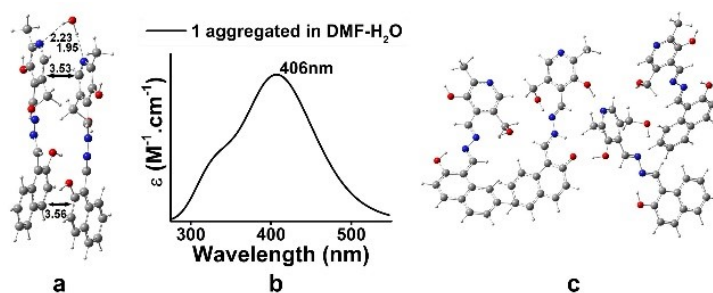

**Figure 3S:** (a) Optimized geometry of **1**-dimer in DMF-H<sub>2</sub>O, (b) UV-Vis spectra of **1**-dimer in DMF-H<sub>2</sub>O, and (c) Optimized geometry **1**-tetramer in DMF without H<sub>2</sub>O molecules.

**Table 2S.** Simulated absorption wavelengths ( $\lambda_{max}$ ), oscillator strengths ( $f$ ), and the composition of the corresponding electronic transitions (H = HOMO; L = LUMO) calculated using B3LYP/6-31g(d) level of theory.

| Compound                                        | $\lambda_{max}$<br>(nm)   | $f$  | $\epsilon$<br>( $10^4$ ) | Main compositions<br>(contribution) |
|-------------------------------------------------|---------------------------|------|--------------------------|-------------------------------------|
| <b>1</b> - in DMF-H <sub>2</sub> O              | 421<br>(397) <sup>a</sup> | 0.80 | 2.37                     | H→L (99%)                           |
| <b>1</b> -aggregated<br>in DMF-H <sub>2</sub> O | 427<br>(406) <sup>a</sup> | 0.46 | 2.34                     | H-1→L+2 (76%)                       |
| <b>1</b> -dianionic in<br>DMF-H <sub>2</sub> O  | 490<br>(500) <sup>a</sup> | 0.98 | 2.04                     | H→L (99%)                           |
| <b>1</b> -<br>monoanionic in<br>DMF-water       | 498<br>(500) <sup>a</sup> | 0.89 | 2.01                     | H→L (100%)                          |

<sup>a</sup>a indicates the experimental values

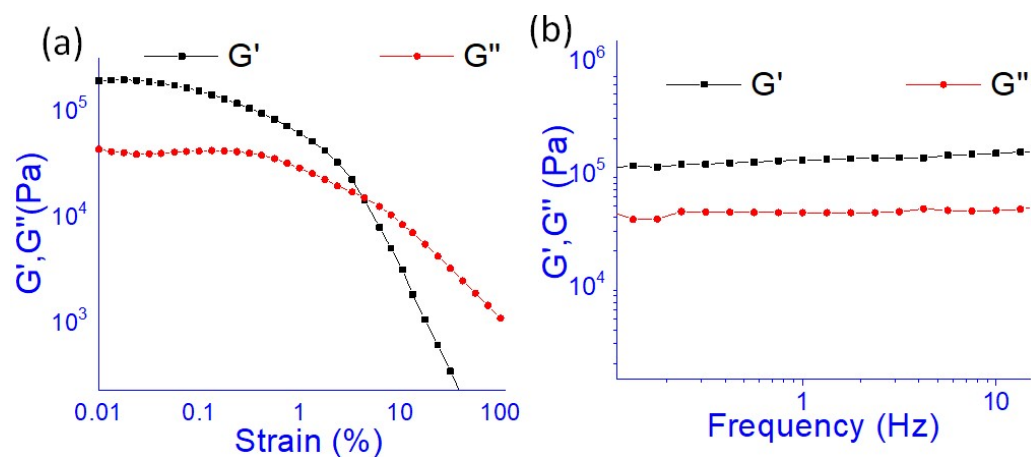

**Figure 4S.** Rheological studies of the gel of **1** with 1 equivalent amount of  $F^-$  ion: (a) amplitude sweep (at constant frequency of 1Hz) and (b) frequency sweep (at constant 0.1% strain) experiments [gel was prepared at its cgc in DMF/ $H_2O$  (10:1, v/v)].

**Table 3S.** Summary of rheological properties of the  $F^-$  treated gel of **1**.

| Gel        | Critical strain (%) | Cross-over (%)<br>(strain) | $G'_{av}$ (Pa) | $G''_{av}$ (Pa) | $G'_{av}/G''_{av}$ | $\tan \delta$<br>( $G''_{av}/G'_{av}$ ) |
|------------|---------------------|----------------------------|----------------|-----------------|--------------------|-----------------------------------------|
| <b>1.F</b> | 0.01                | 4.2                        | 127294         | 43941           | 2.89               | 0.346                                   |

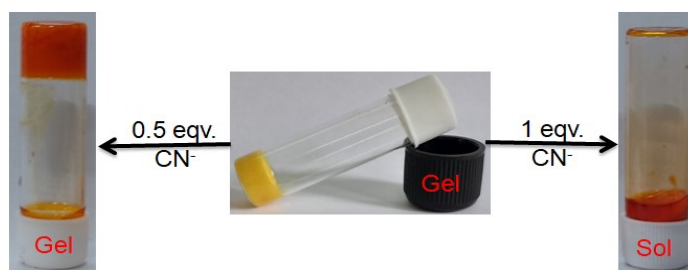

**Figure 5S.** Photograph showing the minimum amount of  $CN^-$  needed to break the gel of **1** [7 mg dissolved in 1 mL of DMF:  $H_2O$  (10:1, v/v);  $c = 2.08 \times 10^{-2}$  M].

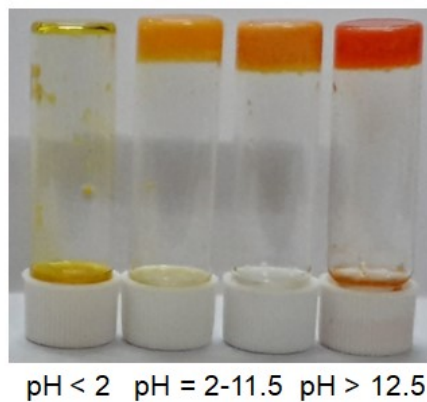

**Figure 6S.** Photograph showing the phase change with pH.

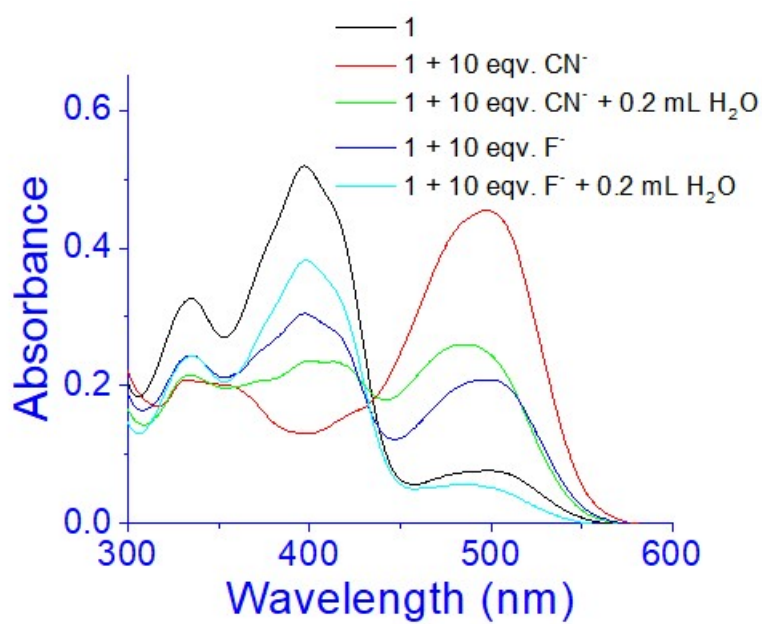

**Figure 7S:** UV-vis spectra of **1** ( $c = 2.5 \times 10^{-5} \text{ M}$ ) to distinguish  $\text{CN}^-$  from  $\text{F}^-$  through addition of  $\text{H}_2\text{O}$ .

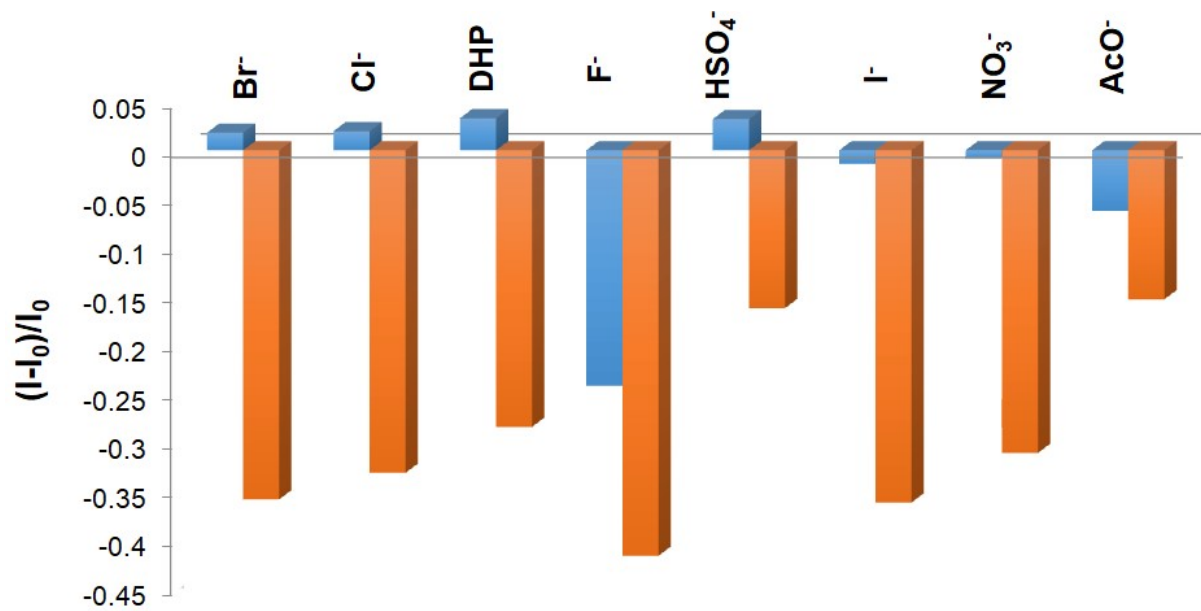

**Figure 8S.** Photograph showing Selectivity of **1** ( $c = 2.5 \times 10^{-5}$  M) for  $\text{CN}^-$  ion in DMF:  $\text{H}_2\text{O}$  (10:1, v/v).

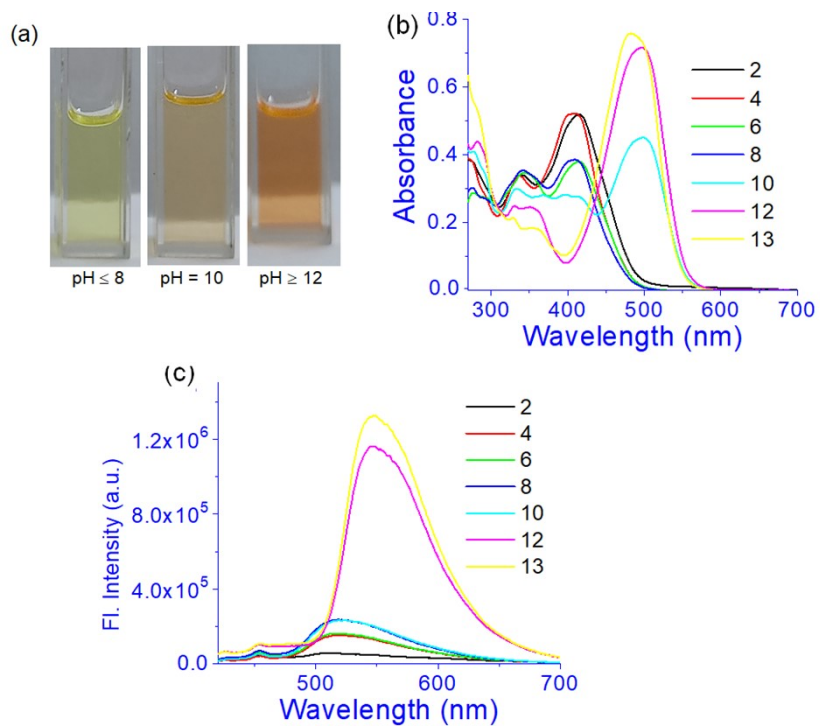

**Figure 9S.** The change in (a) color, (b) absorbance and (c) emission of compound **1** ( $c = 2.5 \times 10^{-5}$  M) with variation of pH.

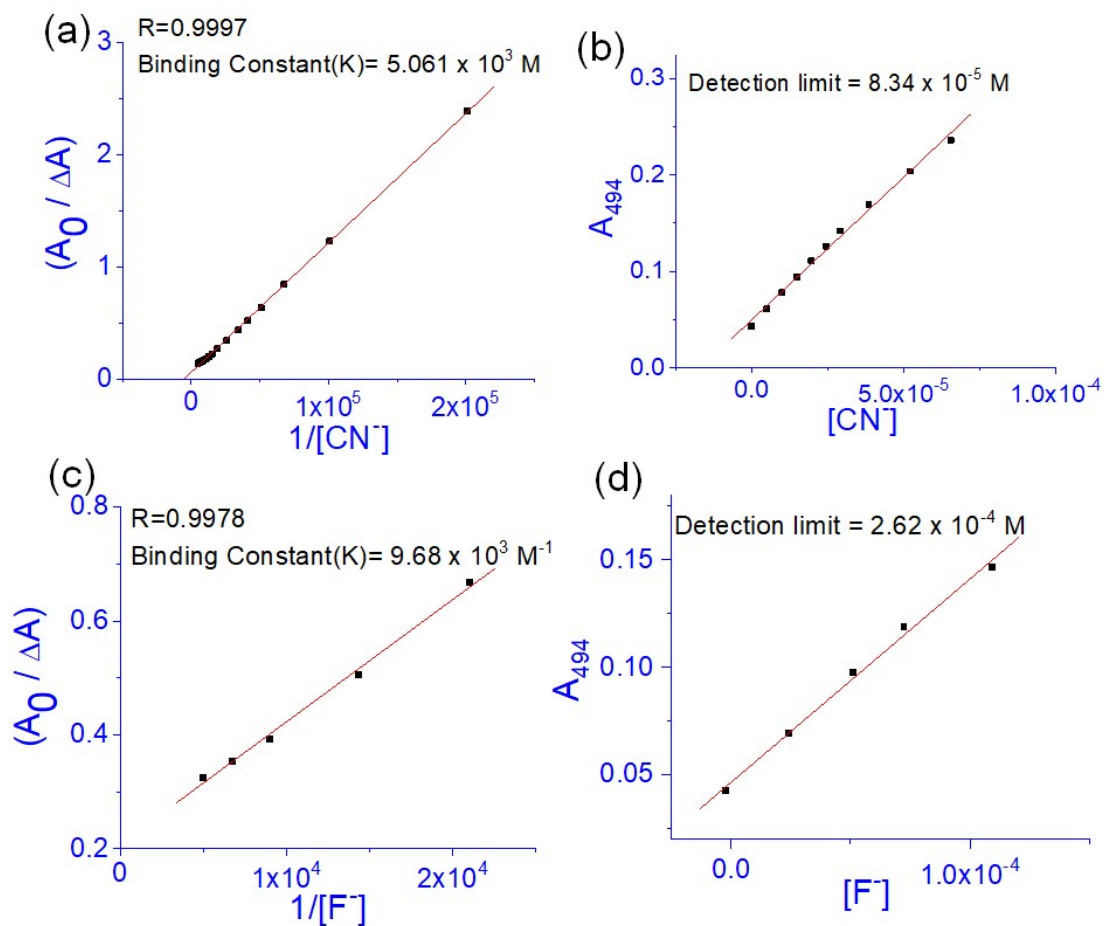

**Figure 10S.** Benesi–Hildebrand plots for **1** with (a)  $CN^-$  and (c)  $F^-$  and detection limits of **1** ( $c = 2.5 \times 10^{-5}$  M) with (b)  $CN^-$  and (d)  $F^-$  ( $c = 1.0 \times 10^{-3}$  M) in DMF:  $H_2O$  (10:1, v/v) by considering absorbance change at 494 nm.

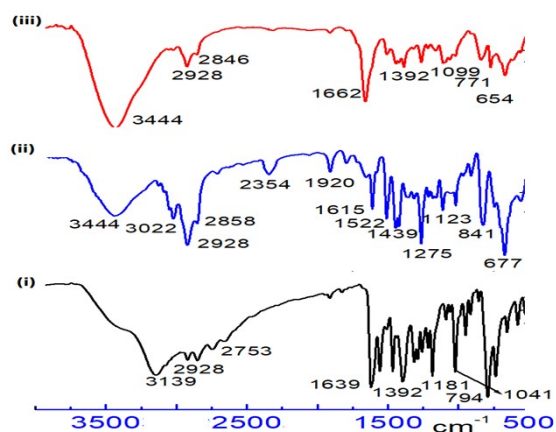

**Figure 11S:** FTIR spectra of: (i) **1**, (ii) Merrifield resin and (iii) **1** hooked to Merrifield resin (**1a**).

<sup>1</sup>H NMR of compound **1** in d<sub>6</sub>-DMSO (400 MHz)

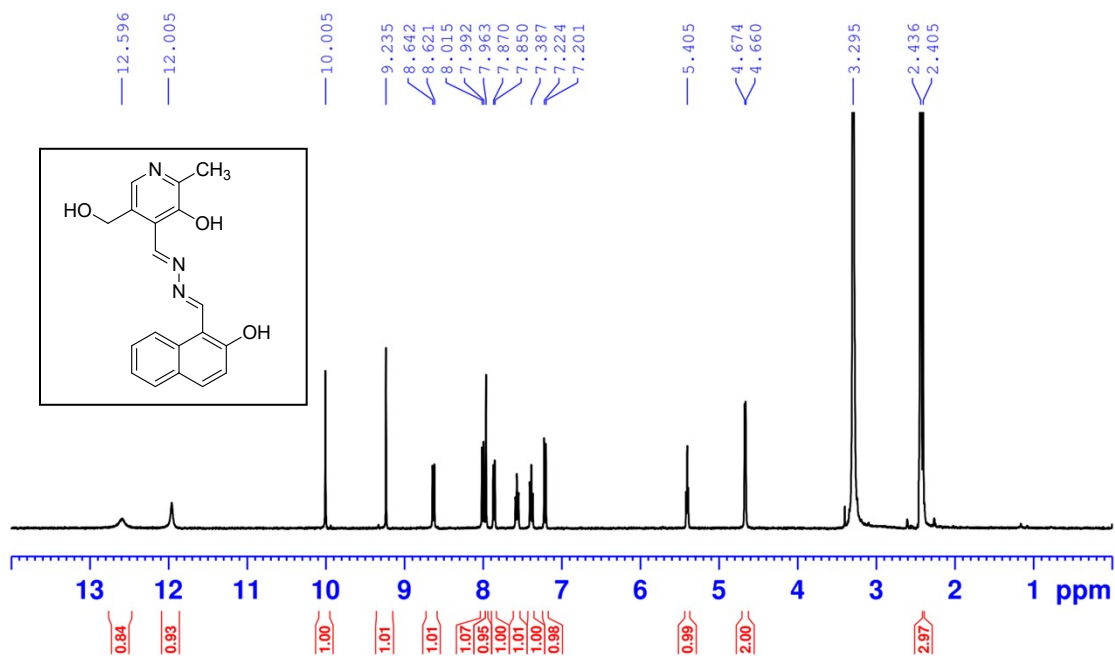

<sup>13</sup>C NMR of compound **1** in d<sub>6</sub>-DMSO (100 MHz)

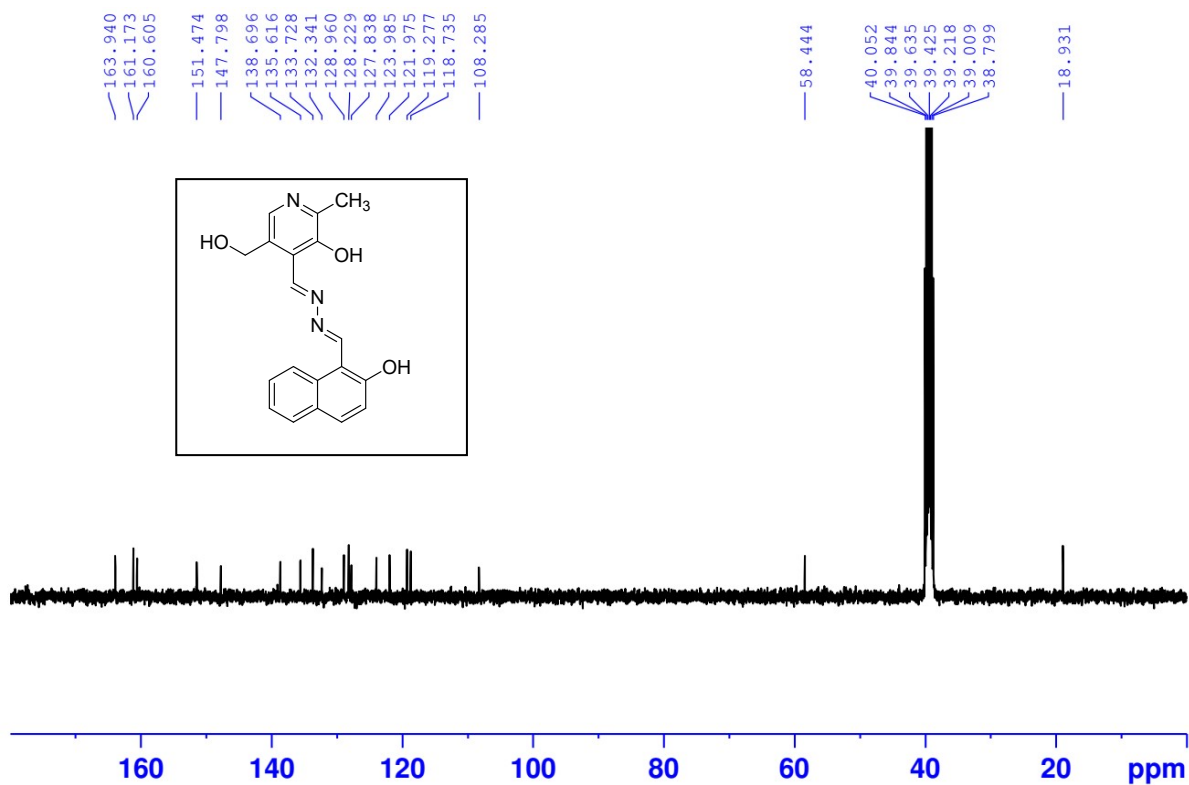

# Mass spectra of Compound 1

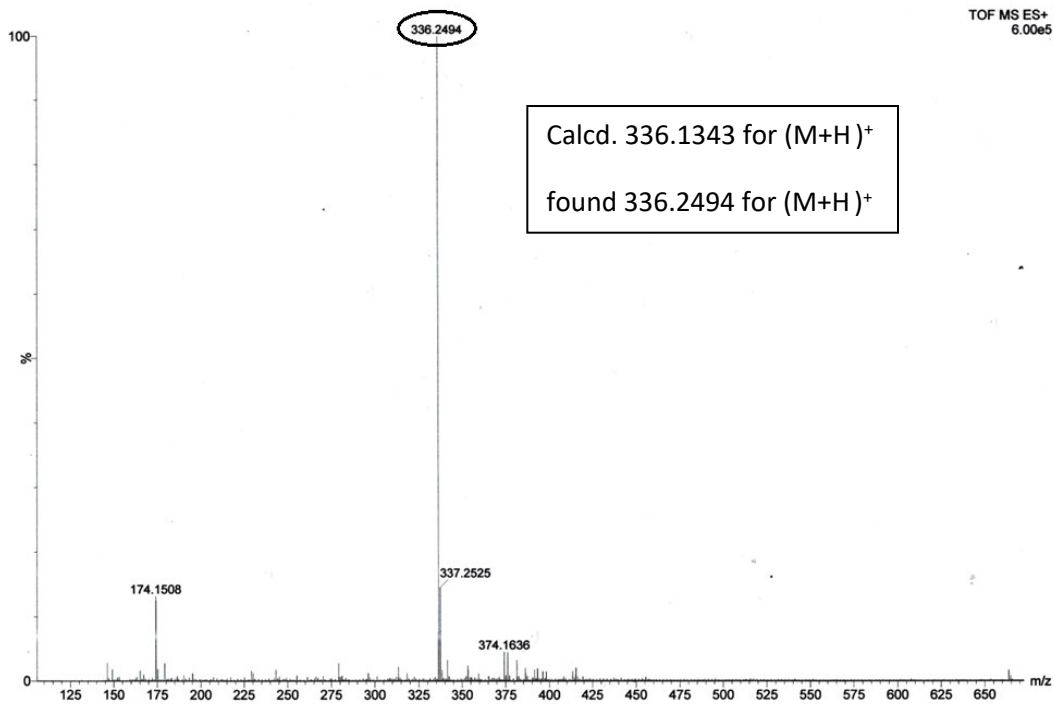

# <sup>1</sup>H NMR of compound 4 in CDCl<sub>3</sub> (400 MHz)

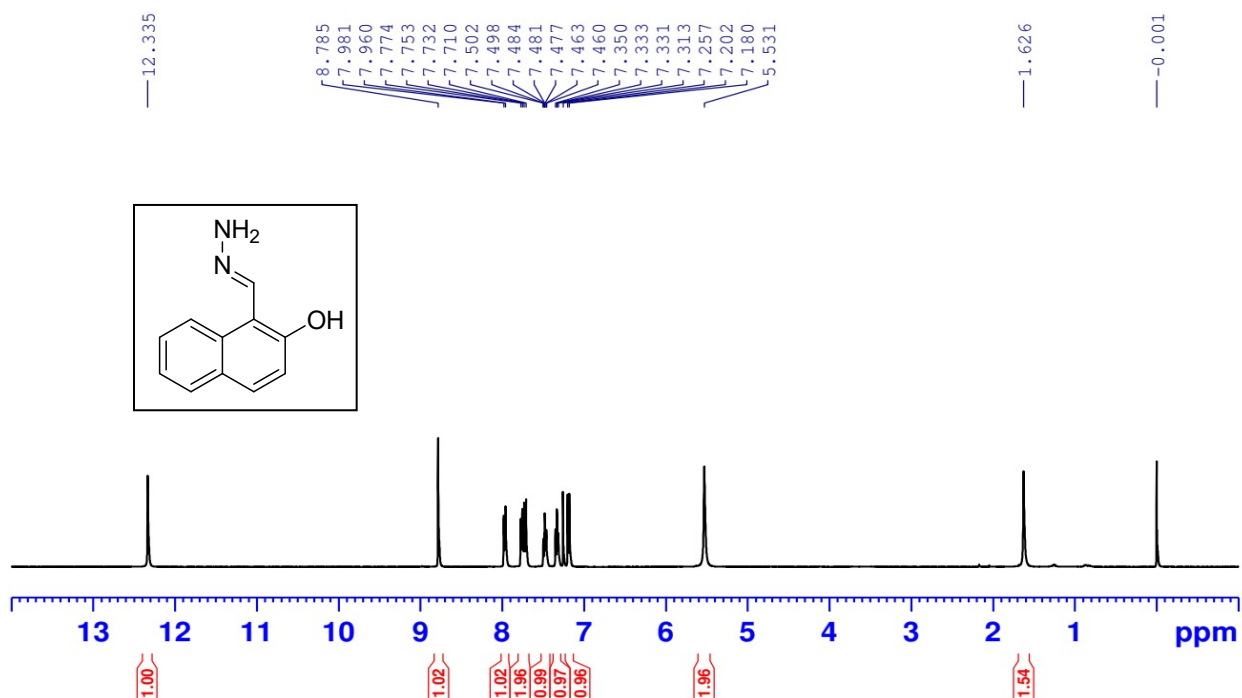



$^{13}\text{C}$  NMR of compound **4** in  $\text{CDCl}_3$  (100 MHz)

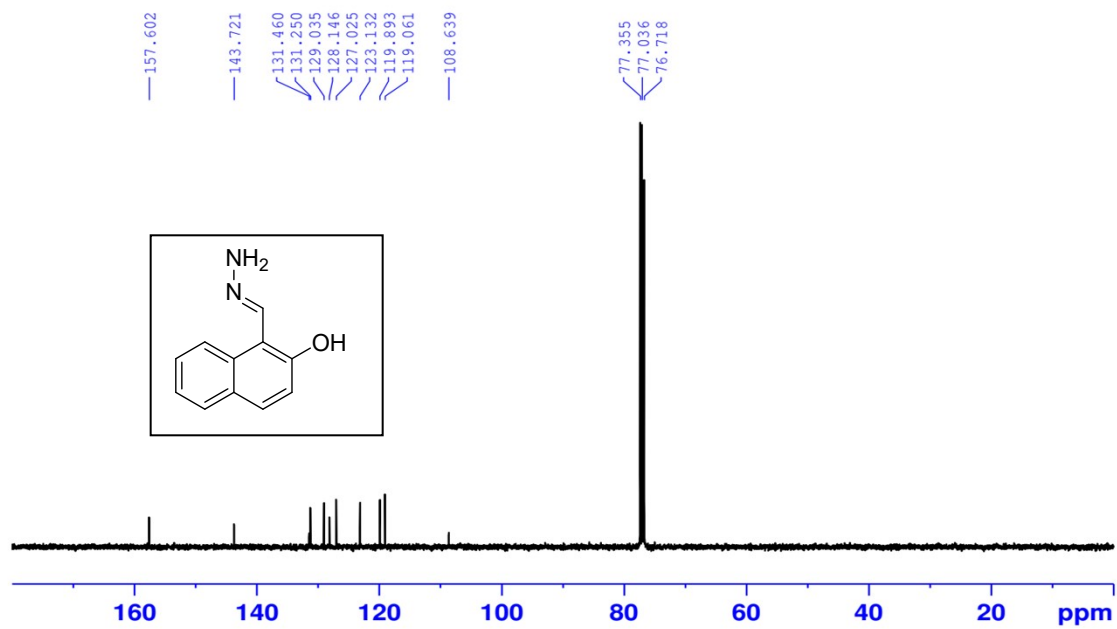

$^1\text{H}$  NMR of compound **3** in  $\text{CDCl}_3$  (400 MHz)

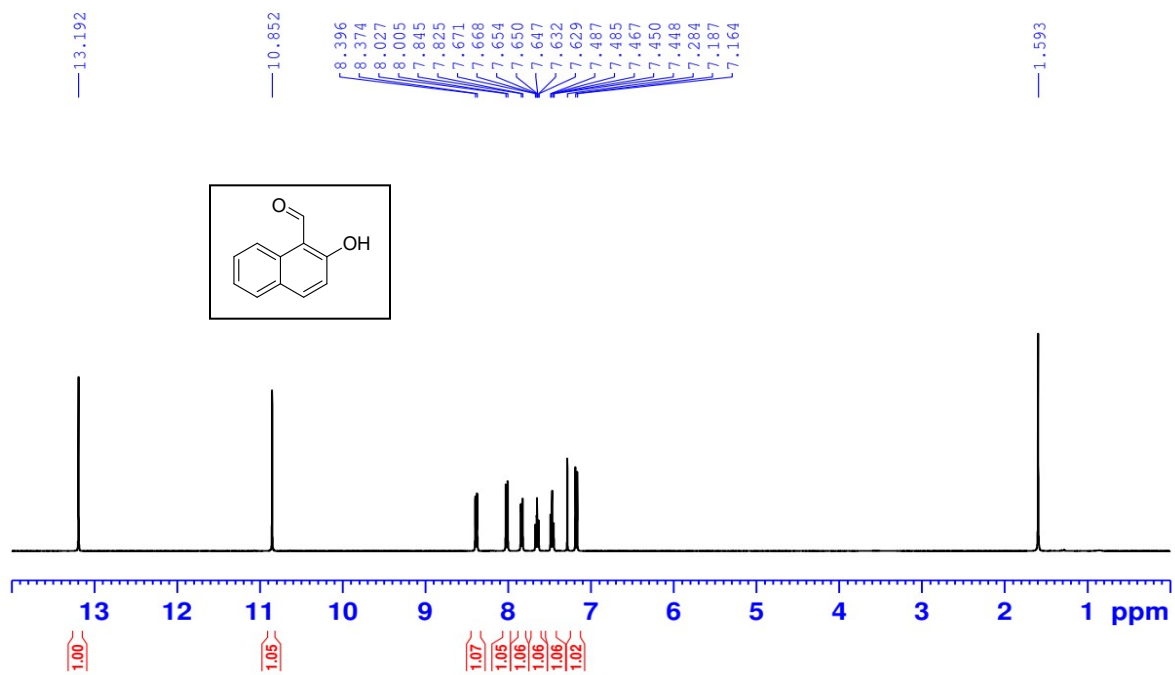

Supplement: d2su00135g1.pdf [file d2su00135g1.pdf]
